# Supplementary material for: Prediction of structurally stable two-dimensional AuClO2 with high thermoelectric performance
Source: Royal Society of Chemistry journal article supplement (doi:10.1039/d3ta01037f), 2023-01-01
Supplement: d3ta01037f1.pdf [file d3ta01037f1.pdf]

Electronic Supplementary Material (ESI) for Journal of Materials Chemistry A.  
This journal is © The Royal Society of Chemistry 2023

## Prediction of Structurally Stable Two-Dimensional AuClO<sub>2</sub> with High Thermoelectric Performance

Puxin Cheng,<sup>a</sup> Geng Li,<sup>a,b\*</sup> Yinchang Zhao,<sup>c</sup> Xiangfei Meng,<sup>b</sup> Shuming Zeng,<sup>c\*</sup> and Jialiang Xu<sup>a\*</sup>

<sup>a</sup> School of Materials Science and Engineering, National Institute for Advanced Materials, Nankai University,  
Tongyan Road 38, Tianjin 300350, P. R. China

E-mail: [jialiang.xu@nankai.edu.cn](mailto:jialiang.xu@nankai.edu.cn)

<sup>b</sup> National Supercomputer Center in Tianjin, Tianjin 300457, P. R. China

E-mail: [ligeng@nsc-tj.cn](mailto:ligeng@nsc-tj.cn)

<sup>c</sup> Department of Physics, Yantai University, Yantai 264005, P. R. China

<sup>d</sup> Department of Physics, Yangzhou University, Yangzhou 225009, P. R. China

E-mail: [zengsm@yzu.edu.cn](mailto:zengsm@yzu.edu.cn)

## Supplementary Information

**Mechanical Properties.** The mechanical properties of AuClO<sub>2</sub> monolayer has been performed in VASPKIT code using the strain-stress method.<sup>1</sup> As shown in Table S1, four independent elastic constants  $C_{ij}$  are deduced for the orthorhombic lattice with a  $P222_1$  space group, which satisfy the mechanical stability criteria  $C_{11} > 0$ ,  $C_{33} > 0$ , and  $C_{11} \times C_{22} > C_{12}^2$ . The low elastic constants are relevant to the low lattice thermal conductivity.<sup>2</sup> It can be evidently defined from Fig. S7 that AuClO<sub>2</sub> possesses strong mechanical anisotropy for the huge variety of Bulk modulus (B), Young's modulus (E), and Shear modulus (G) along different directions.

**Calculation Method.** The lattice thermal conductivity  $\kappa_l$  has been calculated with a  $14 \times 14 \times 1$   $q$ -point mesh in ShengBTE code. The required harmonic and anharmonic interatomic force constants (IFCs) are both computed by VASP combined with PHONOPY and THIRDORDER.PY script with a  $3 \times 2 \times 1$  supercell.<sup>3</sup> The IFC2 is obtained through the finite-difference approach in PHONOPY, and the IFC3 is carried out in THIRDORDER.PY script with the same approach. The interactions up to third-nearest neighbors are considered for anharmonic IFCs.

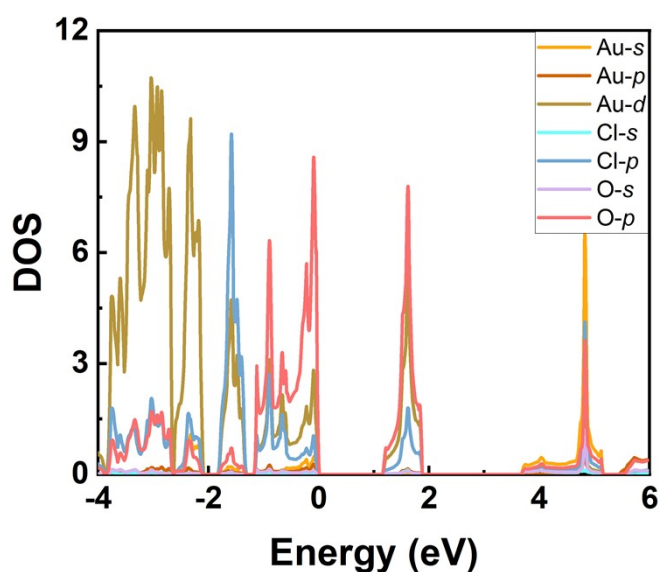

Figure S1. The calculated partial electronic density of states (PDOS) projected to valence orbitals under GGA-PBE exchange-correction function.

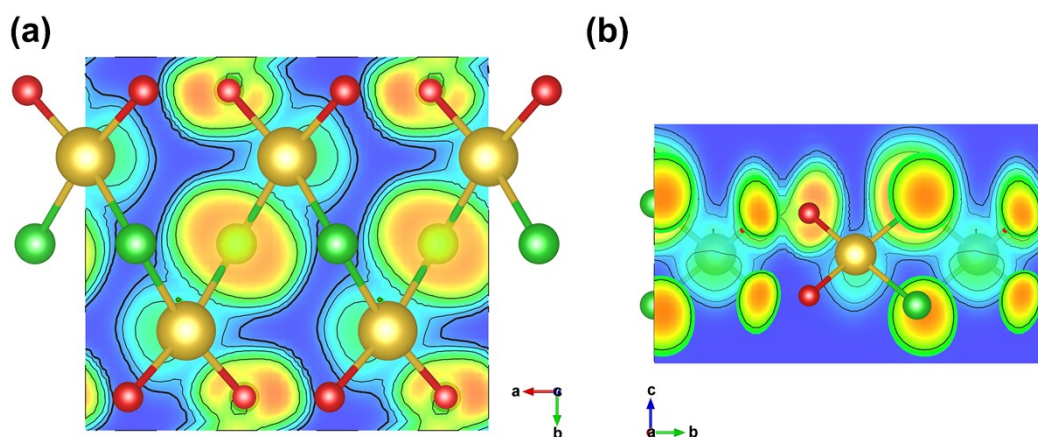

Figure S2. The 2D projected electron location function (ELF) of  $\text{AuClO}_2$  along (001) and (101) plane visualized by VESTA. The distances from origin are 11 Å (left) and 4 Å (right), respectively.

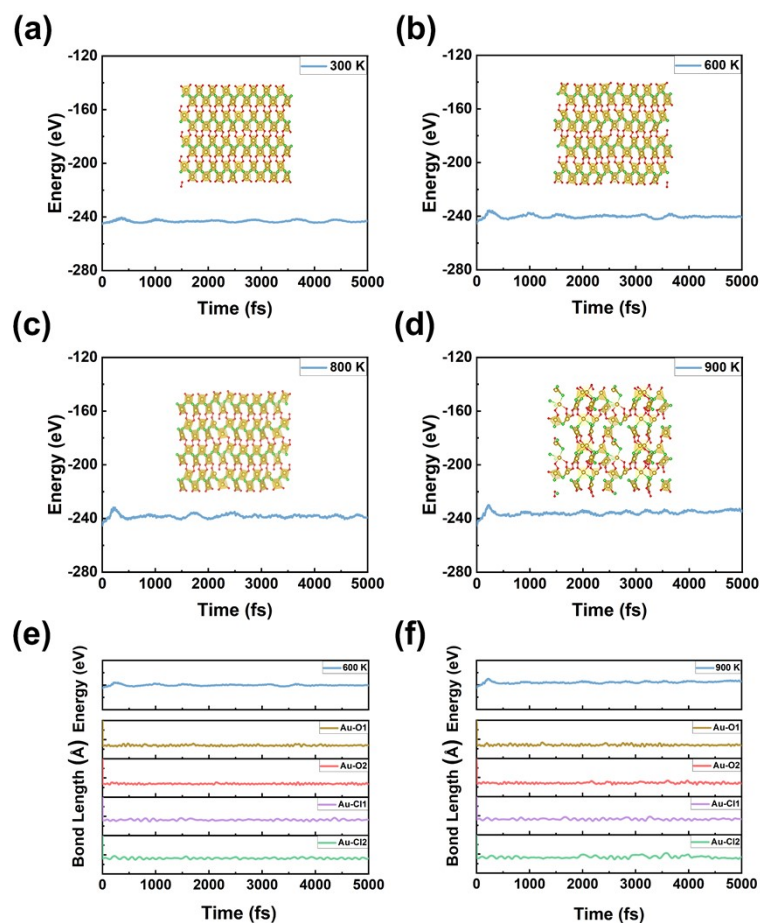

Figure S3. MD simulations of  $\text{AuClO}_2$ . (a)–(d) The total energy fluctuation at 300 K, 600 K, 800 K and 900 K, respectively. Inset: the corresponding snapshots of the structure after 5000 fs. (e)–(f) The bond lengths fluctuation under 600 K and 900 K.

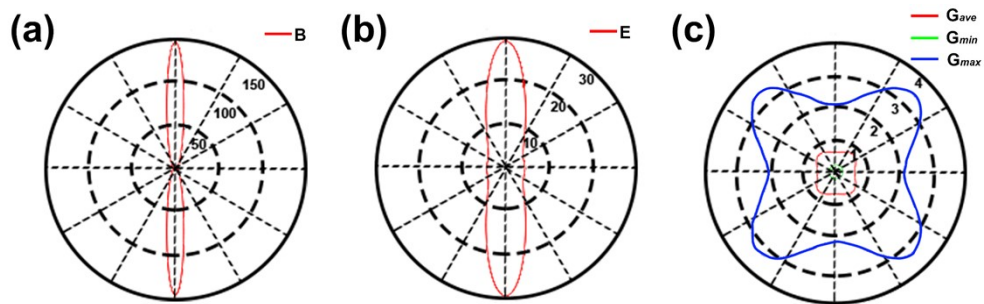

Figure S4. Polar diagrams for (a) Bulk modulus (B), (b) Young's modulus (E), and (c) Shear modulus (G) of  $\text{AuClO}_2$ .

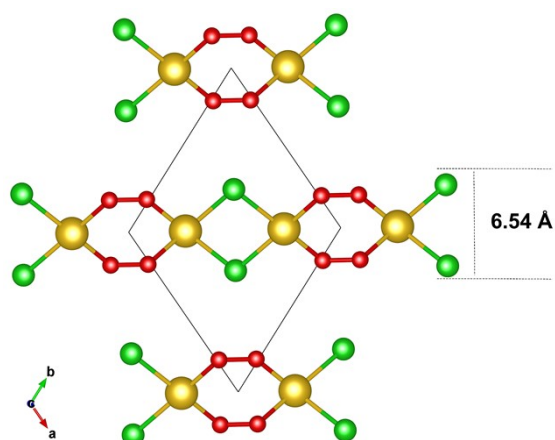

Figure S5. The measured effective thickness of  $\text{AuClO}_2$  monolayers.

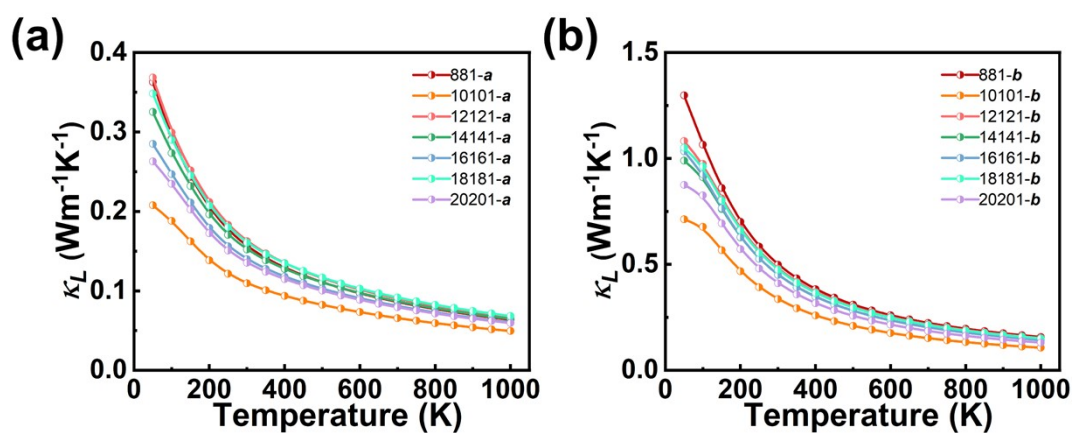

Figure S6. Temperature-dependent  $\kappa_L$  of  $\text{AuClO}_2$  along the (a)  $a$ -axes, and (b)  $b$ -axes under different  $q$ -point mesh.

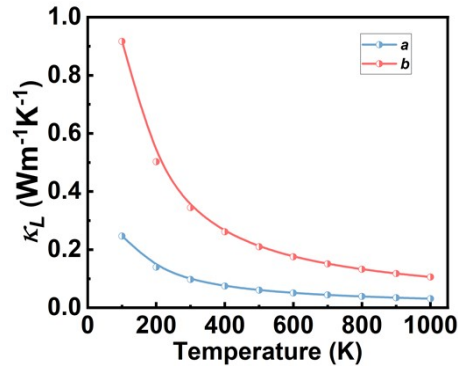

Figure S7. Temperature-dependent  $\kappa_L$  of  $\text{AuClO}_2$  along the  $a$ - and  $b$ -axes calculated with the ShengBTE code.

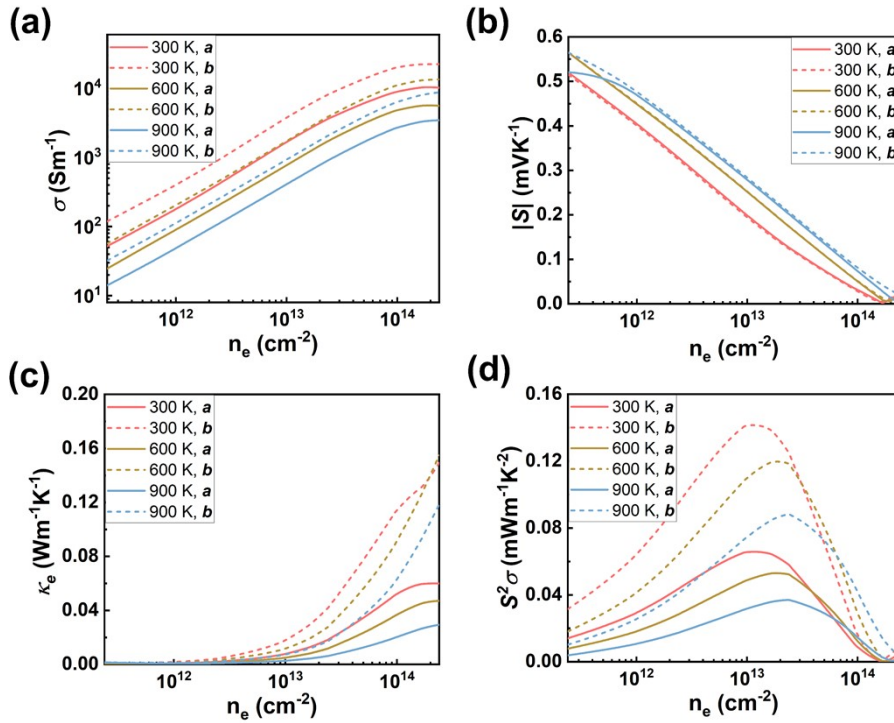

Figure S8. The electronic transport parameters of  $n$ -type  $\text{AuClO}_2$  at 300 K, 600 K and 900 K. (a) Electronic conductivity ( $\sigma$ ), (b) Seebeck coefficient ( $|S|$ ), (c) Electronic thermal conductivity ( $\kappa_e$ ), and (d) Power factor ( $S^2\sigma$ ) along  $a$  and  $b$  axes.

Table S1. The calculated elastic constants ( $C_{ij}$ ) (GPa), Bulk modulus (B) (GPa), Young's modulus (E) (GPa), and Shear modulus (G) (GPa) for AuClO<sub>2</sub>.

|                    | $C_{11}$ | $C_{12}$ | $C_{22}$ | $C_{33}$ | B    | E    | $G_{ave}$ |
|--------------------|----------|----------|----------|----------|------|------|-----------|
| AuClO <sub>2</sub> | 4.54     | 2.11     | 29.86    | 0.83     | 2.68 | 3.78 | 1.49      |

Table S2. The Cartesian coordinates of optimized structure AuClO<sub>2</sub>.

| Atom | x           | y           | z            |
|------|-------------|-------------|--------------|
| Au   | 1.945842147 | 5.279081563 | 11.965113640 |
| Au   | 0.000000000 | 1.923428318 | 11.965113640 |
| Cl   | 2.918763220 | 3.601254940 | 13.356273936 |
| Cl   | 0.972921073 | 3.601254940 | 10.573952630 |
| O    | 1.120960327 | 0.644329668 | 10.835441591 |
| O    | 3.066802590 | 6.558180105 | 13.094784975 |
| O    | 2.770723851 | 0.644329668 | 13.094784975 |
| O    | 0.824881762 | 6.558180105 | 10.835441591 |

## References

- S1 V. Wang, N. Xu, J.-C. Liu, G. Tang and W.-T. Geng, *Comput. Phys. Commun.*, 2021, **267**, 108033.
- S2 S. Tang, M. Wu, S. Bai, D. Luo, J. Zhang and S. Yang, *J. Alloys Compd.*, 2022, **907**, 164439.
- S3 A. Togo, Oba, Fumiyasu, Tanaka, Isao, *Phys. Rev. B*, 2008, **78**, 134106.
